# Supplementary material
Source: MDPI journal article supplement (https://www.mdpi.com/2673-9410/4/2/14)
Supplement: s1 [file s1]

**Table S2.** All samples of *Sargassum wingei* collected during the two expeditions. All samples are deposited in HCOM Herbarium

| Station | Date       | Latitude (N) | Longitude (W) | Code HERBARIUM                   |
|---------|------------|--------------|---------------|----------------------------------|
| S2      | 22/06/2017 | 07°50.950'   | 48°59.550'    | HCOM S2-S1-1 to 3                |
| S3      | 23/06/2017 | 08°33.710'   | 48°29.940'    | HCOM S3-S1-1 to 3                |
| S4      | 23/06/2017 | 08°51.950'   | 49°08.380'    | HCOM S4-S1-1 to 3                |
| S5      | 24/06/2017 | 10°32.630'   | 51°02.530'    | HCOM S5-S1-1 to 3                |
| S6      | 24/06/2017 | 10°43.540'   | 51°46.030'    | HCOM S6-S1-1 to 3                |
| S7      | 25/06/2017 | 11°13.690'   | 53°49.410'    | HCOM S7-S1-1 to 3                |
| S8      | 25/06/2017 | 11°26.550'   | 54°21.760'    | HCOM S8-S1-1 to 3                |
| S9      | 26/06/2017 | 12°46.160'   | 55°31.040'    | HCOM S9-S1-1 to 3                |
| S10     | 27/06/2017 | 14°58.440'   | 59°07.230'    | HCOM S10-S1-1 to 3               |
| S11     | 28/06/2017 | 14°59.620'   | 59°45.870'    | HCOM S11-S1-1 to 3               |
| S12     | 29/06/2017 | 15°57.270'   | 61°59.300'    | HCOM S12-S1-1 to 3               |
| S14     | 02/07/2017 | 15°53.616'   | 61°02.773'    | HCOM S14-S1-1 to 3               |
| S15     | 03/07/2017 | 17°19.134'   | 59°36.044'    | HCOM S15-S1-1 to 3               |
| S16     | 04/07/2017 | 19°40.327'   | 58°41.059'    | HCOM S16-S1-1 to 3               |
| S17     | 04/07/2017 | 20°27.113'   | 58°45.029'    | HCOM S17-S1-1 to 3               |
| S18     | 05/07/2017 | 22°34.038'   | 59°11.416'    | HCOM S18-S1-1 to 3               |
| S19     | 05/07/2017 | 23°01.740'   | 59°13.367'    | HCOM S19-S1-1 to 3               |
| S20     | 06/07/2017 | 25°36.575'   | 59°44.544'    | HCOM S20-S1-2 & 3; HCOM S20-S3-1 |
| S21     | 06/07/2017 | 24°42.700'   | 59°56.919'    | HCOM S21-S1-1 to 3               |
| S23     | 09/07/2017 | 16°07.366'   | 61°57.353'    | HCOM S23-S1-1 to 3               |
| S24     | 10/07/2017 | 15°56.087'   | 61°32.602'    | HCOM S24-S1-1 to 3               |
| S30     | 11/07/2017 | 15°51.980'   | 61°33.212'    | HCOM S30-S1-1 to 3               |
| Y2      | 8/10/2017  | 9°20.520'    | 19°55.060'    | HCOM Y02-S1-1 to 3               |
| Y4      | 10/10/2017 | 8°18.146'    | 21°34.633'    | HCOM Y04-S1-1 to 3               |
| Y6      | 12/10/2017 | 10°25.792'   | 29°02.017'    | HCOM Y06-S1-1 to 3               |
| Y8      | 14/10/2017 | 11°13.086'   | 35°59.970'    | HCOM Y08-S1-1 to 3               |
| Y11     | 17/10/2017 | 12°07.644'   | 50°02.548'    | HCOM Y11-S1-1 to 3               |
| Y12     | 18/10/2017 | 12°37.539'   | 53°03.779'    | HCOM Y12-S1-1 to 3               |
| Y15     | 21/10/2017 | 14°33.295'   | 61°35.655'    | HCOM Y15-S1-1 to 3               |
